# Supplementary material for: Measuring the Metabolic Evolution of Glioblastoma throughout Tumor Development, Regression, and Recurrence with Hyperpolarized Magnetic Resonance
Source: MDPI journal article supplement (doi:10.3390/cells10102621), 2021-10-01
Supplement: s1 [file s1]

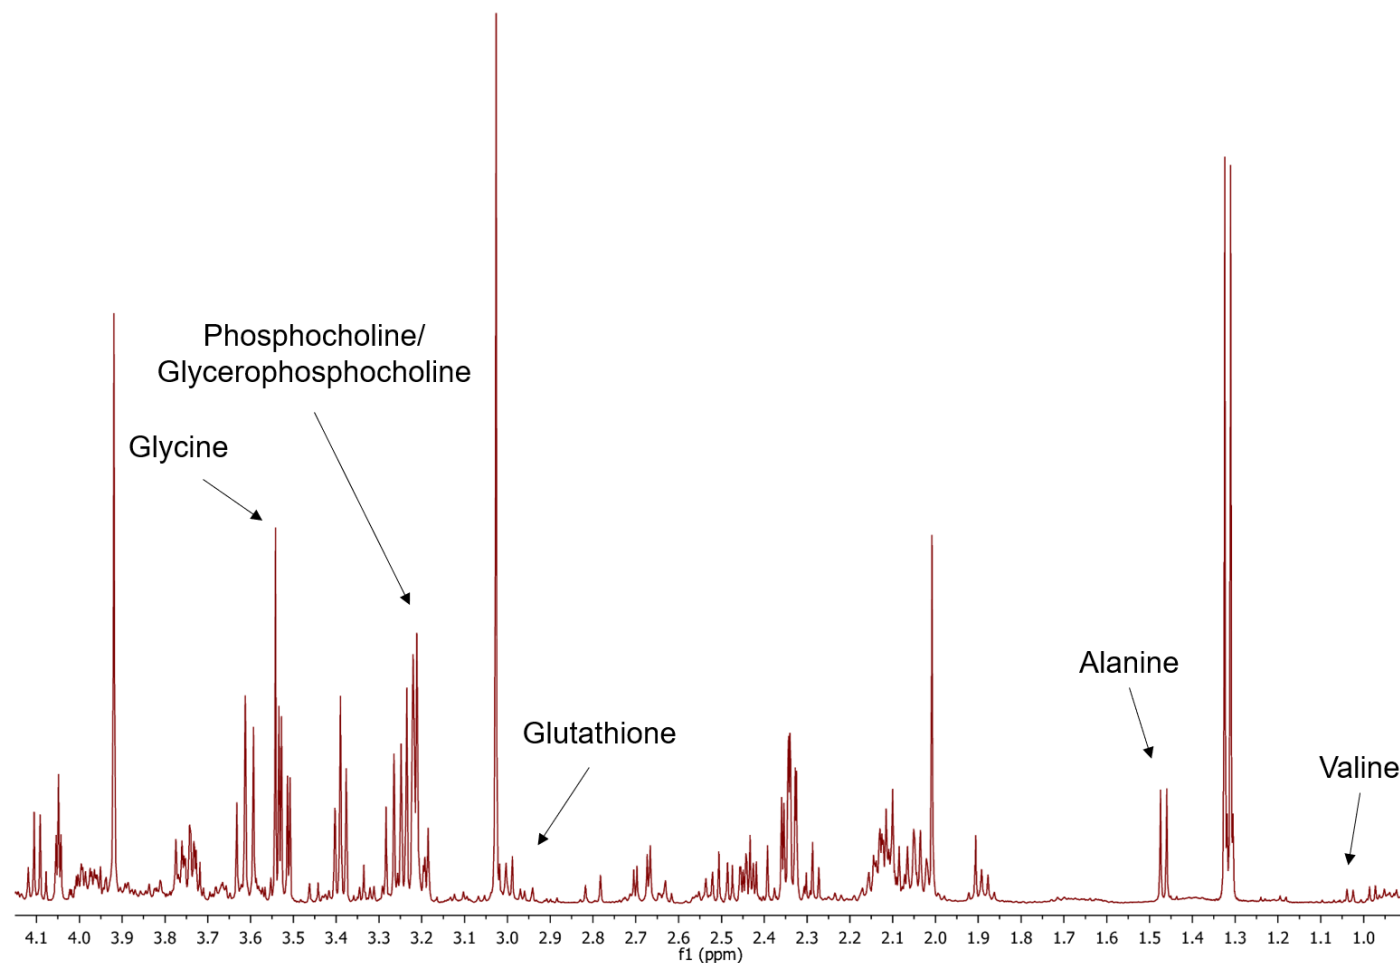

**Figure S1.** Representative NMR spectrum for *ex vivo* metabolomic analysis. Peaks from the metabolites that were significantly altered among controls, untreated/treated are labeled. This particular spectrum was from an untreated tumor on Day 34.
